# Supplementary material for: Aerosol-assisted synthesis of mesoporous aluminosilicate microspheres: the effect of the aluminum precursor
Source: Royal Society of Chemistry journal article supplement (doi:10.1039/c5nj02825f), 2016-01-01
Supplement: c5nj02825f1.pdf [file c5nj02825f1.pdf]

## Supporting Information

### **Aerosol-assisted synthesis of mesoporous aluminosilicate microspheres: the effect of the aluminum precursor**

Sonia Fiorilli<sup>a</sup>, Valentina Cauda<sup>b</sup>, Lucia Pontiroli<sup>a,c</sup>, Chiara Vitale-Brovarone<sup>a</sup>, Barbara Onida<sup>a\*</sup>

<sup>a</sup> Dipartimento di Scienza Applicata e Tecnologia, Politecnico di Torino, Corso Duca degli Abruzzi 24, 10129 Torino, Italy

<sup>b</sup> Center for Space Human Robotics - [IIT@PoliTO](mailto:IIT@PoliTO), Istituto Italiano di Tecnologia, Corso Trento 21 10129 Torino, Italy

<sup>c</sup> Division of Oral Biology, University of Leeds School of Dentistry, St. James's University Hospital, Leeds LS9 7TF, United Kingdom

\*Corresponding author: Tel: +39 011 0904631; E-mail: [barbara.onida@polito.it](mailto:barbara.onida@polito.it)

SI.1

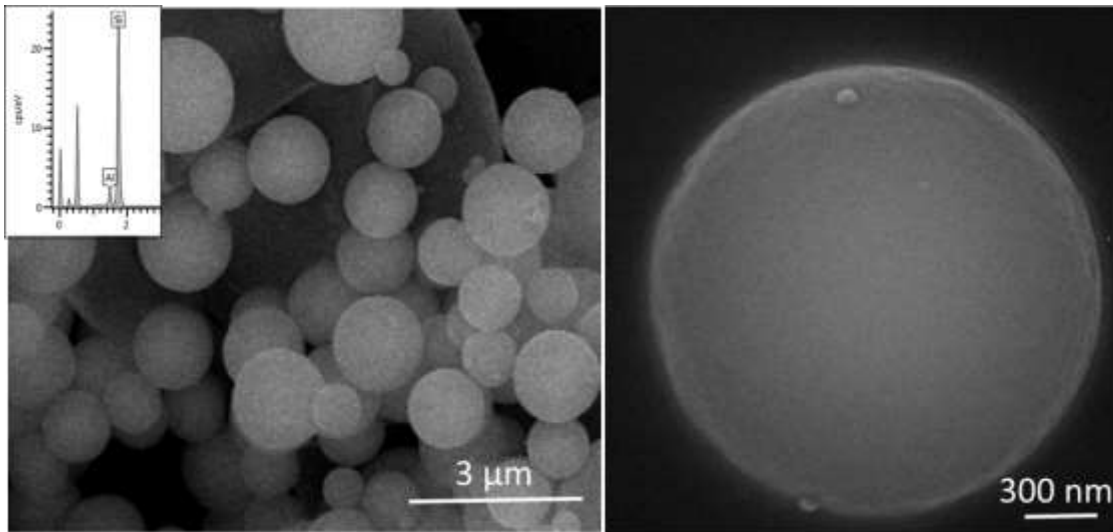

Figure 1: FE-SEM images of sprayed Al\_ISO\_20 (left) and Al\_Cl\_20 (right). The inset is related to EDX spectrum of Al\_ISO\_20.

SI.2

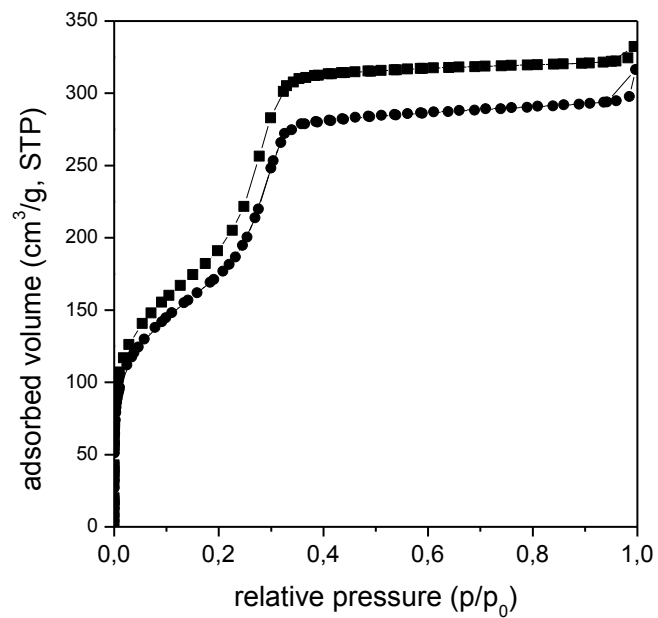

SI.2: Nitrogen adsorption isotherms of Al\_ISO\_20 (circles) and Al\_Cl\_20 (squares).

SI.3

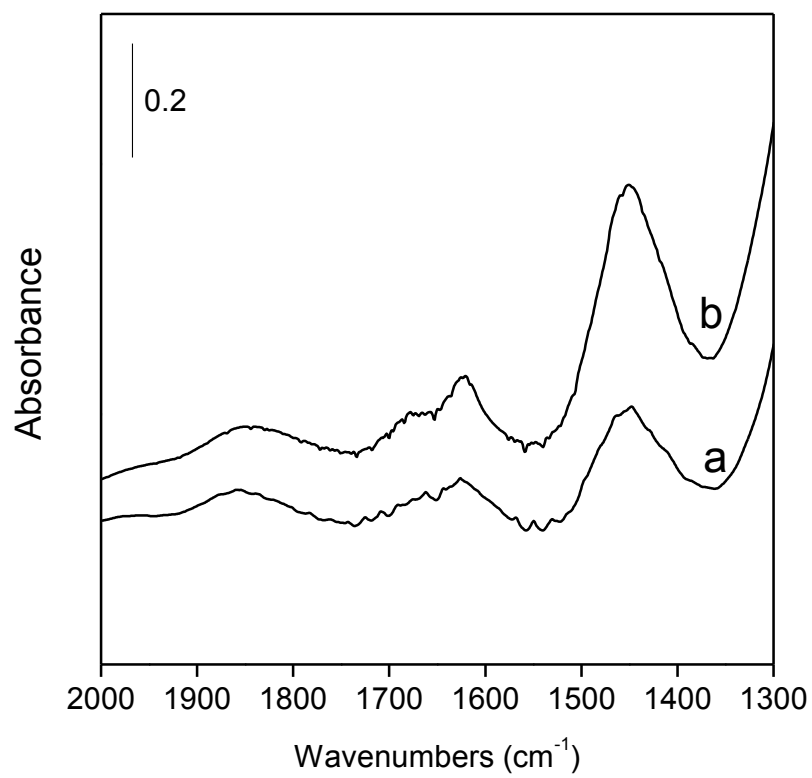

SI.3: IR spectra recorded on Al\_ISO\_20 (a) and Al\_ISO\_10 (b) outgassed at 573 K after ammonia adsorption and prolonged evacuation at RT
